# Supplementary material for: Selective etching mechanism of silicon oxide against silicon by hydrogen fluoride: a density functional theory study
Source: Royal Society of Chemistry journal article supplement (doi:10.1039/d2cp05456f), 2023-01-01
Supplement: d2cp05456f1.pdf [file d2cp05456f1.pdf]

## **Supplementary information**

# **Selective Etching Mechanism of Silicon Oxide**

## **Against Silicon by Hydrogen Fluoride: A**

### **Density Functional Theory Study**

Romel Hidayat,<sup>1</sup> Hye-Lee Kim,<sup>2</sup> Khabib Khumaini,<sup>1,3</sup> Tanzia Chowdhury,<sup>1</sup> Tirta Rona Mayangsari,<sup>3</sup> Byungchul Cho,<sup>4</sup> Sangjoon Park,<sup>4</sup> and Won-Jun Lee<sup>1,2,a)</sup>

<sup>1</sup>Department of Nanotechnology and Advanced Materials Engineering, Sejong University, Seoul, 05006, Republic of Korea

<sup>2</sup>Metal-organic Compounds Materials Research Center, Sejong University, Seoul, 05006, Republic of Korea

<sup>3</sup>Department of Chemistry, Universitas Pertamina, Jakarta 12220, Indonesia

<sup>4</sup>Wonik IPS, Pyeongtaek, 17709, Republic of Korea

<sup>a)</sup>Electronic mail: [wjlee@sejong.ac.kr](mailto:wjlee@sejong.ac.kr)

## Bond dissociation energy (BDE) in gas-phase molecules

The method described in the literature<sup>1-3</sup> was used to compute the bond dissociation energies (BDEs).

| Bonds | Molecular sample    | Chemical structure Schematic                                                        | Atomistic structure Schematic                                                       | BDE (eV) |
|-------|---------------------|-------------------------------------------------------------------------------------|-------------------------------------------------------------------------------------|----------|
| Si-F  | F <sub>3</sub> Si-F |    |  | 7.07     |
| O-H   | HO-H                |  |  | 5.20     |
| H-F   | H-F                 |  |  | 6.02     |
| H-H   | H-H                 |  |  | 4.25     |

Fig. S1. The bond dissociation energy (BDE) values in gas-phase molecules.

## BDE in the species on the SiO<sub>2</sub> surface models

| Bonds | Species sample | Chemical structure Schematic | Atomistic structure Schematic | BDE (eV) |
|-------|----------------|------------------------------|-------------------------------|----------|
| Si-O  | -Si-OH*        |                              |                               | 6.15     |
| Si-O  | -Si-OH*        |                              |                               | 6.20     |
| Si-O  | -Si-O-         |                              |                               | 7.17     |
| Si-O  | -Si-O-         |                              |                               | 6.16     |
| Si-F  | -Si-F*         |                              |                               | 7.21     |
| Si-F  | -(F)Si-F*      |                              |                               | 7.08     |
| Si-F  | -(F)2Si-F*     |                              |                               | 7.07     |
| O-H   | -SiO-H*        |                              |                               | 5.04     |
| O-H   | -SiO-H*        |                              |                               | 5.14     |

Fig. S2. The bond dissociation energy (BDE) values in surface species on hydroxylated and fluorinated SiO<sub>2</sub> surfaces.

## Desorption of H<sub>2</sub>O after the first fluorination step of SiO<sub>2</sub> by HF

The method described in the literature<sup>1</sup> was used to compute the temperature-dependent desorption free energy of a byproduct after the reaction of HF with the SiO<sub>2</sub> surface model.

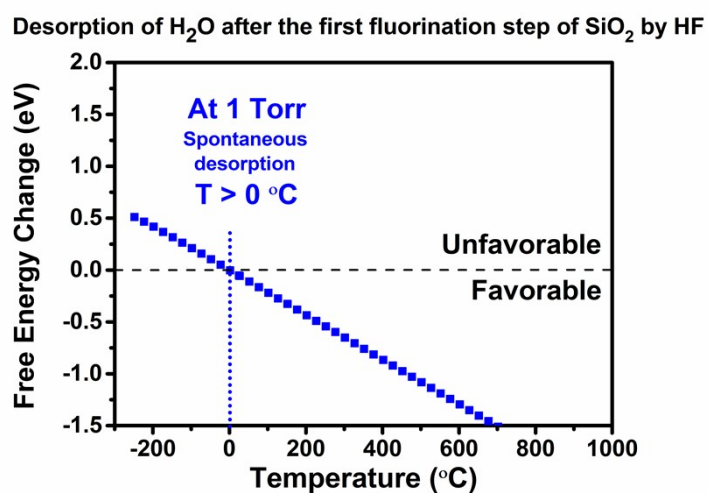

Fig. S3. The temperature-dependent free energy change for the desorption of H<sub>2</sub>O after the first fluorination step of silicon oxide by hydrogen fluoride.

## Desorption of SiF<sub>4</sub> after the fourth fluorination step of SiO<sub>2</sub> by HF

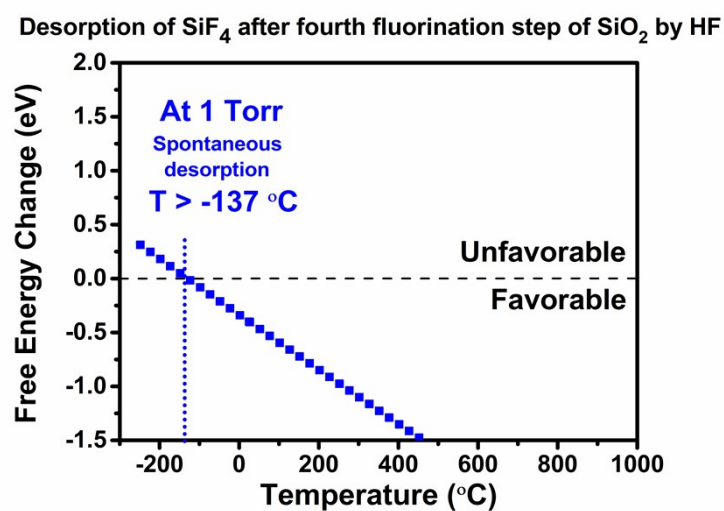

Fig. S4. The temperature-dependent free energy change for the desorption of SiF<sub>4</sub> after the fourth fluorination step of silicon oxide by hydrogen fluoride.

## BDE in the species on the silicon surface models

| Bonds | Species sample | Chemical structure Schematic                                                        | Atomistic structure Schematic                                                        | BDE (eV) |
|-------|----------------|-------------------------------------------------------------------------------------|--------------------------------------------------------------------------------------|----------|
| Si-H  | -Si-H*         | 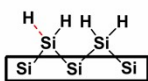   |    | 3.23     |
| Si-H  | -Si-H*         |    |    | 3.20     |
| Si-Si | -Si-Si-        |    |    | 2.47     |
| Si-Si | -Si-Si-        |    |    | 2.02     |
| Si-F  | -Si-F*         |   |   | 5.97     |
| Si-F  | -Si-F*         |  |  | 6.12     |
| Si-F  | -Si-F*         |  |  | 6.53     |
| Si-H  | -Si-H*         |  |  | 3.01     |
| Si-H  | -Si-H*         |  |  | 3.18     |

Fig. S5. The bond dissociation energy (BDE) values in surface species on hydrogenated and fluorinated Si surfaces.

## Desorption of H<sub>2</sub> after the first fluorination step of silicon by HF

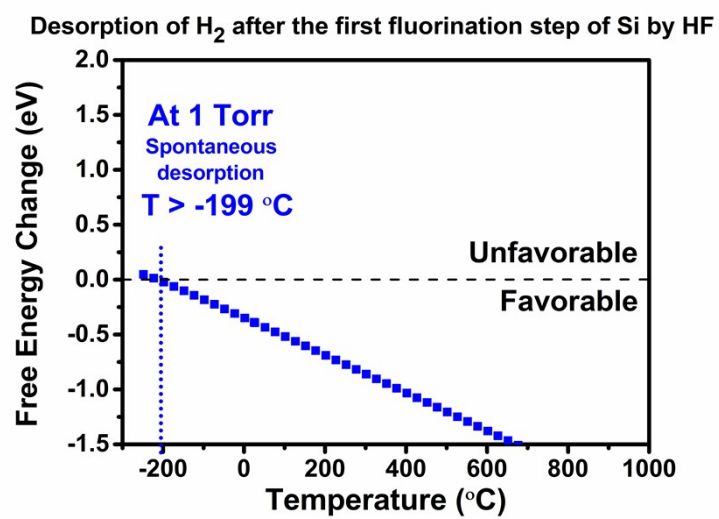

Fig. S6. The temperature-dependent free energy change for the desorption of H<sub>2</sub> after the first fluorination step of silicon by hydrogen fluoride.

## Desorption of SiF<sub>4</sub> after the fourth fluorination step of silicon by HF

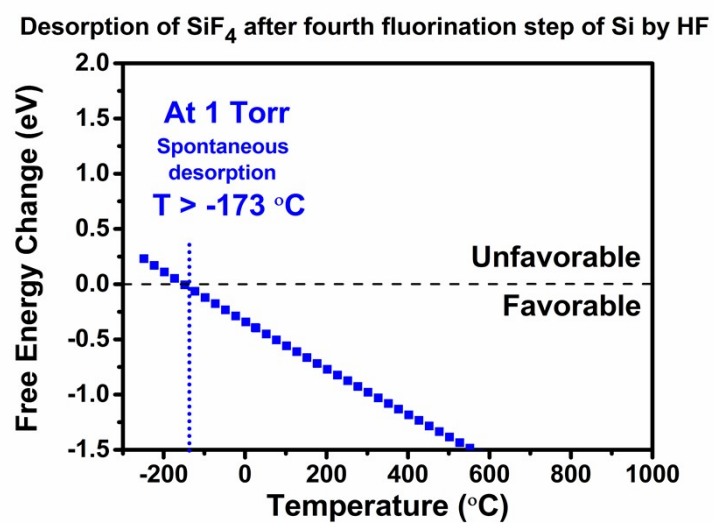

Fig. S7. The temperature-dependent free energy change for the desorption of SiF<sub>4</sub> after the fourth fluorination step of silicon by hydrogen fluoride.



## References

- <sup>1</sup> S. Kim, R. Hidayat, H. Roh, J. Kim, H.-L. Kim, K. Khumaini, M. Park, J.-H. Seok, J.W. Park, and W.-J. Lee, *J. Mater. Chem. C* **10**, 6696 (2022).
- <sup>2</sup> A.K. Chandra and T. Uchimaru, *J. Phys. Chem. A* **104**, 9244 (2000).
- <sup>3</sup> S.J. Blanksby and G.B. Ellison, *Acc. Chem. Res.* **36**, 255 (2003).
